# Supplementary material for: Immunotherapy, prognostic, and tumor biomarker based on pancancer analysis, SMARCD3
Source: publisher site journal article supplement (doi:10.18632/aging.205921), 2024-06-11
Supplement: Supplementary file [file aging-v16i11-205921-supplementary-material-SD2.pdf]

## SUPPLEMENTARY TABLES

**Supplementary Table 1. Primer sequences.**

| Gene ID | Forward primer       | Reverse primer       |
|---------|----------------------|----------------------|
| β-actin | CATCCGCAAAGACCTGTACG | CCTGCTTGCTGATCCACATC |
| SMARCD3 | GGACGAAGTTGCCGGAGG   | TGGGGCATCCGGGCT      |

Abbreviation: RT-qPCR: Real-time quantitative PCR.

**Supplementary Table 2. Association of SMARCD3 with OS in 33 cancers by univariate COX analysis.**

| Cancer | HR    | 95% Low | 95% High | P-value |
|--------|-------|---------|----------|---------|
| ACC    | 0.60  | 0.38    | 0.92     | 0.02    |
| BLCA   | 0.97  | 0.81    | 1.17     | 0.75    |
| BRCA   | 0.81  | 0.66    | 0.99     | 0.04    |
| CESC   | 1.02  | 0.73    | 1.41     | 0.91    |
| CHOL   | 1.34  | 0.73    | 2.45     | 0.34    |
| COAD   | 1.90  | 1.17    | 3.08     | 0.01    |
| DLBC   | 0.93  | 0.21    | 4.21     | 0.93    |
| ESCA   | 0.90  | 0.62    | 1.32     | 0.60    |
| GBM    | 0.88  | 0.65    | 1.19     | 0.39    |
| HNSC   | 1.17  | 0.97    | 1.42     | 0.10    |
| KICH   | 1.39  | 0.39    | 4.95     | 0.61    |
| KIRC   | 1.67  | 1.36    | 2.06     | 0.00    |
| KIRP   | 0.78  | 0.54    | 1.11     | 0.16    |
| LAML   | 0.88  | 0.70    | 1.10     | 0.28    |
| LGG    | 0.65  | 0.45    | 0.94     | 0.02    |
| LIHC   | 1.19  | 0.98    | 1.44     | 0.07    |
| LUAD   | 0.75  | 0.62    | 0.91     | 0.00    |
| LUSC   | 0.98  | 0.83    | 1.16     | 0.83    |
| MESO   | 1.03  | 0.83    | 1.28     | 0.77    |
| OV     | 1.00  | 0.88    | 1.14     | 0.98    |
| PAAD   | 0.59  | 0.43    | 0.80     | 0.00    |
| PCPG   | 2.46  | 1.08    | 5.63     | 0.03    |
| PRAD   | 0.70  | 0.28    | 1.78     | 0.46    |
| READ   | 1.49  | 0.67    | 3.29     | 0.32    |
| SARC   | 0.98  | 0.80    | 1.20     | 0.84    |
| SKCM   | 1.06  | 0.89    | 1.26     | 0.52    |
| STAD   | 1.33  | 1.05    | 1.69     | 0.02    |
| TGCT   | 1.02  | 0.41    | 2.53     | 0.97    |
| THCA   | 0.84  | 0.29    | 2.38     | 0.74    |
| THYM   | 1.62  | 0.50    | 5.24     | 0.42    |
| UCEC   | 1.43  | 1.15    | 1.77     | 0.00    |
| UCS    | 1.35  | 0.89    | 2.05     | 0.16    |
| UVM    | 12.07 | 4.12    | 35.40    | 0.00    |

Abbreviations: ACC: adrenocortical cancer; BLCA: bladder urothelial carcinoma; BRCA: breast invasive carcinoma; CESC: cervical and endocervical cancer; CHOL: cholangiocarcinoma; COAD: colon adenocarcinoma; DLBC: diffuse large B-cell lymphoma; ESCA: esophageal carcinoma; GBM glioblastoma multiforme; GO: Gene Ontology; GSEA: Gene Set Enrichment; H: High; HNSC: head and neck squamous cell carcinoma; HR: Hazard Ratio; KEGG: Kyoto Encyclopedia of Genes and Genomes; KICH kidney chromophobe; KIRC: kidney clear cell carcinoma; KIRP: kidney papillary cell carcinoma; L: Low; LAML: acute myeloid leukemia;

LGG: brain lower grade glioma; LIHC: liver hepatocellular carcinoma; LUAD: lung adenocarcinoma; LUSC: lung squamous cell carcinoma; MESO: mesothelioma; MHC: major histocompatibility complex; OS: Overall Survival; OV: ovarian serous cystadenocarcinoma; PAAD: pancreatic adenocarcinoma; PCPG: pheochromocytoma and paraganglioma; PRAD: prostate adenocarcinoma; *P*-value: Probability; READ: rectum adenocarcinoma; SARC: sarcoma; SKCM: skin cutaneous melanoma; STAD: stomach adenocarcinoma; TGCT: testicular germ cell tumor; THCA thyroid carcinoma; THYM: thymoma; UCEC: uterine corpus endometrioid carcinoma; UCS uterine carcinosarcoma; UVM: uveal melanoma; 95% High: 95% confidence interval upper limit; 95% Low: 95% confidence interval lower limit.

**Supplementary Table 3. Association of SMARCD3 with DFS in 33 cancers by univariate COX analysis.**

| Cancer | HR   | 95% Low | 95% High | <i>P</i> -value |
|--------|------|---------|----------|-----------------|
| ACC    | 1.04 | 0.37    | 2.89     | 0.94            |
| BLCA   | 1.07 | 0.66    | 1.72     | 0.79            |
| BRCA   | 0.84 | 0.64    | 1.11     | 0.23            |
| CEC    | 1.17 | 0.68    | 2.02     | 0.58            |
| CHOL   | 1.77 | 0.82    | 3.82     | 0.14            |
| COAD   | 0.92 | 0.33    | 2.59     | 0.88            |
| DLBC   | 2.78 | 0.15    | 52.41    | 0.49            |
| ESCA   | 1.38 | 0.81    | 2.35     | 0.24            |
| HNSC   | 1.60 | 1.06    | 2.44     | 0.03            |
| KICH   | 0.52 | 0.04    | 6.75     | 0.62            |
| KIRC   | 0.47 | 0.18    | 1.21     | 0.12            |
| KIRP   | 0.62 | 0.40    | 0.97     | 0.04            |
| LGG    | 3.46 | 1.22    | 9.75     | 0.02            |
| LIHC   | 1.01 | 0.83    | 1.24     | 0.90            |
| LUAD   | 1.02 | 0.78    | 1.32     | 0.90            |
| LUSC   | 0.95 | 0.70    | 1.30     | 0.75            |
| MESO   | 1.10 | 0.47    | 2.60     | 0.82            |
| OV     | 1.01 | 0.85    | 1.19     | 0.91            |
| PAAD   | 0.55 | 0.29    | 1.05     | 0.07            |
| PCPG   | 1.64 | 0.45    | 5.94     | 0.45            |
| PRAD   | 1.20 | 0.69    | 2.10     | 0.52            |
| READ   | 0.82 | 0.12    | 5.76     | 0.85            |
| SARC   | 0.97 | 0.77    | 1.22     | 0.80            |
| STAD   | 1.72 | 1.09    | 2.72     | 0.02            |
| TGCT   | 1.07 | 0.77    | 1.49     | 0.68            |
| THCA   | 0.55 | 0.24    | 1.25     | 0.16            |
| UCEC   | 1.21 | 0.92    | 1.60     | 0.17            |
| UCS    | 0.66 | 0.27    | 1.62     | 0.37            |

Abbreviations: ACC: adrenocortical cancer; BLCA: bladder urothelial carcinoma; BRCA: breast invasive carcinoma; CESC: cervical and endocervical cancer; CHOL: cholangiocarcinoma; COAD: colon adenocarcinoma; DFS: Disease Free Survival; DLBC: diffuse large B-cell lymphoma; ESCA: esophageal carcinoma; GBM glioblastoma multiforme; GO: Gene Ontology; GSEA: Gene Set Enrichment; H: High; HNSC: head and neck squamous cell carcinoma; HR: Hazard Ratio; KEGG: Kyoto Encyclopedia of Genes and Genomes; KICH kidney chromophobe; KIRC: kidney clear cell carcinoma; KIRP: kidney papillary cell carcinoma; L: Low; LAML: acute myeloid leukemia; LGG: brain lower grade glioma; LIHC: liver hepatocellular carcinoma; LUAD: lung adenocarcinoma; LUSC: lung squamous cell carcinoma; MESO: mesothelioma; MHC: major histocompatibility complex; OV: ovarian serous cystadenocarcinoma; PAAD: pancreatic adenocarcinoma; PCPG: pheochromocytoma and paraganglioma; PRAD: prostate adenocarcinoma; *P*-value: Probability; READ: rectum adenocarcinoma; SARC: sarcoma; SKCM: skin cutaneous melanoma; STAD: stomach adenocarcinoma; TGCT: testicular germ cell tumor; THCA thyroid carcinoma; THYM: thymoma; UCEC: uterine corpus endometrioid carcinoma; UCS uterine carcinosarcoma; UVM: uveal melanoma; 95% High: 95% confidence interval upper limit; 95% Low: 95% confidence interval lower limit.

**Supplementary Table 4. Association of SMARCD3 with DSS in 33 cancers by univariate COX analysis.**

| <b>Cancer</b> | <b>HR</b> | <b>95% Low</b> | <b>95% High</b> | <b>P-value</b> |
|---------------|-----------|----------------|-----------------|----------------|
| ACC           | 0.64      | 0.38           | 1.09            | 0.10           |
| BLCA          | 0.99      | 0.80           | 1.24            | 0.96           |
| BRCA          | 0.82      | 0.63           | 1.08            | 0.15           |
| CESC          | 1.05      | 0.73           | 1.51            | 0.80           |
| CHOL          | 1.53      | 0.79           | 2.95            | 0.21           |
| COAD          | 2.20      | 1.28           | 3.78            | 0.00           |
| DLBC          | 1.03      | 0.14           | 7.65            | 0.98           |
| ESCA          | 1.28      | 0.84           | 1.95            | 0.26           |
| GBM           | 0.85      | 0.62           | 1.17            | 0.32           |
| HNSC          | 1.20      | 0.94           | 1.53            | 0.15           |
| KICH          | 0.94      | 0.21           | 4.19            | 0.94           |
| KIRC          | 1.74      | 1.34           | 2.26            | 0.00           |
| KIRP          | 0.61      | 0.40           | 0.94            | 0.02           |
| LGG           | 0.64      | 0.43           | 0.95            | 0.03           |
| LIHC          | 1.16      | 0.90           | 1.49            | 0.26           |
| LUAD          | 0.70      | 0.55           | 0.90            | 0.01           |
| LUSC          | 0.87      | 0.66           | 1.14            | 0.30           |
| MESO          | 1.04      | 0.80           | 1.35            | 0.76           |
| OV            | 1.01      | 0.88           | 1.16            | 0.89           |
| PAAD          | 0.58      | 0.41           | 0.82            | 0.00           |
| PCPG          | 3.61      | 1.36           | 9.60            | 0.01           |
| PRAD          | 0.61      | 0.14           | 2.60            | 0.50           |
| READ          | 1.10      | 0.36           | 3.42            | 0.86           |
| SARC          | 0.93      | 0.75           | 1.16            | 0.52           |
| SKCM          | 1.12      | 0.92           | 1.35            | 0.26           |
| STAD          | 1.66      | 1.23           | 2.23            | 0.00           |
| TGCT          | 1.14      | 0.38           | 3.45            | 0.82           |
| THCA          | 2.42      | 0.53           | 11.02           | 0.25           |
| THYM          | 0.38      | 0.05           | 3.06            | 0.36           |
| UCEC          | 1.48      | 1.14           | 1.92            | 0.00           |
| UCS           | 1.47      | 0.90           | 2.41            | 0.13           |
| UVM           | 14.55     | 4.61           | 45.89           | 0.00           |

Abbreviations: ACC: adrenocortical cancer; BLCA: bladder urothelial carcinoma; BRCA: breast invasive carcinoma; CESC: cervical and endocervical cancer; CHOL: cholangiocarcinoma; COAD: colon adenocarcinoma; DLBC: diffuse large B-cell lymphoma; DSS: Disease-specific survival; ESCA: esophageal carcinoma; GBM glioblastoma multiforme; GO: Gene Ontology; GSEA: Gene Set Enrichment; H: High; HNSC: head and neck squamous cell carcinoma; HR: Hazard Ratio; KEGG: Kyoto Encyclopedia of Genes and Genomes; KICH kidney chromophobe; KIRC: kidney clear cell carcinoma; KIRP: kidney papillary cell carcinoma; L: Low; LAML: acute myeloid leukemia; LGG: brain lower grade glioma; LIHC: liver hepatocellular carcinoma; LUAD: lung adenocarcinoma; LUSC: lung squamous cell carcinoma; MESO: mesothelioma; MHC: major histocompatibility complex; OV: ovarian serous cystadenocarcinoma; PAAD: pancreatic adenocarcinoma; PCPG: pheochromocytoma and paraganglioma; PRAD: prostate adenocarcinoma; P-value: Probability; READ: rectum adenocarcinoma; SARC: sarcoma; SKCM: skin cutaneous melanoma; STAD: stomach adenocarcinoma; TGCT: testicular germ cell tumor; THCA thyroid carcinoma; THYM: thymoma; UCEC: uterine corpus endometrioid carcinoma; UCS uterine carcinosarcoma; UVM: uveal melanoma; 95% High: 95% confidence interval upper limit; 95% Low: 95% confidence interval lower limit.

**Supplementary Table 5. Association of SMARCD3 with PFS in 33 cancers by univariate COX analysis.**

| <b>Cancer</b> | <b>HR</b> | <b>95% Low</b> | <b>95% High</b> | <b>P-value</b> |
|---------------|-----------|----------------|-----------------|----------------|
| ACC           | 0.79      | 0.54           | 1.17            | 0.24           |
| BLCA          | 0.99      | 0.82           | 1.20            | 0.92           |
| BRCA          | 0.91      | 0.74           | 1.12            | 0.36           |
| CESC          | 1.25      | 0.93           | 1.69            | 0.13           |
| CHOL          | 1.31      | 0.75           | 2.29            | 0.35           |
| COAD          | 1.62      | 1.07           | 2.43            | 0.02           |
| DLBC          | 0.87      | 0.23           | 3.26            | 0.84           |
| ESCA          | 1.17      | 0.85           | 1.61            | 0.34           |
| GBM           | 0.85      | 0.61           | 1.19            | 0.35           |
| HNSC          | 1.32      | 1.09           | 1.60            | 0.01           |
| KICH          | 1.41      | 0.44           | 4.54            | 0.56           |
| KIRC          | 1.30      | 1.03           | 1.64            | 0.03           |
| KIRP          | 0.64      | 0.47           | 0.88            | 0.01           |
| LGG           | 0.89      | 0.65           | 1.23            | 0.47           |
| LIHC          | 1.00      | 0.84           | 1.20            | 0.97           |
| LUAD          | 0.87      | 0.73           | 1.04            | 0.11           |
| LUSC          | 0.99      | 0.81           | 1.22            | 0.94           |
| MESO          | 1.16      | 0.92           | 1.46            | 0.20           |
| OV            | 1.01      | 0.90           | 1.13            | 0.86           |
| PAAD          | 0.57      | 0.42           | 0.78            | 0.00           |
| PCPG          | 2.59      | 1.56           | 4.29            | 0.00           |
| PRAD          | 1.25      | 0.92           | 1.72            | 0.16           |
| READ          | 1.01      | 0.50           | 2.05            | 0.97           |
| SARC          | 0.90      | 0.76           | 1.07            | 0.23           |
| SKCM          | 0.96      | 0.83           | 1.11            | 0.60           |
| STAD          | 1.42      | 1.10           | 1.83            | 0.01           |
| TGCT          | 1.10      | 0.82           | 1.48            | 0.52           |
| THCA          | 1.11      | 0.63           | 1.96            | 0.71           |
| THYM          | 0.58      | 0.25           | 1.33            | 0.20           |
| UCEC          | 1.27      | 1.06           | 1.52            | 0.01           |
| UCS           | 1.05      | 0.71           | 1.56            | 0.81           |
| UVM           | 21.04     | 7.35           | 60.20           | 0.00           |

Abbreviations: ACC: adrenocortical cancer; BLCA: bladder urothelial carcinoma; BRCA: breast invasive carcinoma; CESC: cervical and endocervical cancer; CHOL: cholangiocarcinoma; COAD: colon adenocarcinoma; DLBC: diffuse large B-cell lymphoma; ESCA: esophageal carcinoma; GBM glioblastoma multiforme; GO: Gene Ontology; GSEA: Gene Set Enrichment; H: High; HNSC: head and neck squamous cell carcinoma; HR: Hazard Ratio; KEGG: Kyoto Encyclopedia of Genes and Genomes; KICH kidney chromophobe; KIRC: kidney clear cell carcinoma; KIRP: kidney papillary cell carcinoma; L: Low; LAML: acute myeloid leukemia; LGG: brain lower grade glioma; LIHC: liver hepatocellular carcinoma; LUAD: lung adenocarcinoma; LUSC: lung squamous cell carcinoma; MESO: mesothelioma; MHC: major histocompatibility complex; OS: Overall Survival; OV: ovarian serous cystadenocarcinoma; PAAD: pancreatic adenocarcinoma; PCPG: pheochromocytoma and paraganglioma; PFS: Progression Free Survival; PRAD: prostate adenocarcinoma; P-value: Probability; READ: rectum adenocarcinoma; SARC: sarcoma; SKCM: skin cutaneous melanoma; STAD: stomach adenocarcinoma; TGCT: testicular germ cell tumor; THCA thyroid carcinoma; THYM: thymoma; UCEC: uterine corpus endometrioid carcinoma; UCS uterine carcinosarcoma; UVM: uveal melanoma; 95% High: 95% confidence interval upper limit; 95% Low: 95% confidence interval lower limit.

**Supplementary Table 8. Correlation analysis between SMARCD3 expression and TMB.**

| <b>Cancer</b> | <b>Cor</b>   | <b>P-value</b> |
|---------------|--------------|----------------|
| ACC           | -0.219213618 | 0.052253821    |
| BLCA          | -0.172776378 | 0.000455573    |
| BRCA          | -0.142354916 | 7.69397E-06    |
| CEC           | -0.046638393 | 0.432043114    |
| CHOL          | -0.030014182 | 0.862047362    |
| COAD          | -0.077877246 | 0.12181763     |
| DLBC          | -0.309862494 | 0.062414348    |
| ESCA          | -0.259936582 | 0.000901999    |
| GBM           | -0.00996257  | 0.904017777    |
| HNSC          | -0.046002095 | 0.308526128    |
| KICH          | 0.030429996  | 0.809841984    |
| KIRC          | -0.190879488 | 0.000470381    |
| KIRP          | 0.016018958  | 0.790313889    |
| LAML          | -0.219775032 | 0.023595958    |
| LGG           | 0.090456267  | 0.042992969    |
| LIHC          | -0.215801783 | 3.73505E-05    |
| LUAD          | -0.307127942 | 1.89596E-12    |
| LUSC          | 0.001764432  | 0.968987937    |
| MESO          | 0.051882115  | 0.649761046    |
| OV            | -0.08188152  | 0.178151807    |
| PAAD          | -0.382028646 | 1.29634E-06    |
| PCPG          | 0.098641222  | 0.191475741    |
| PRAD          | -0.326014321 | 2.12969E-13    |
| READ          | -0.081284564 | 0.354165172    |
| SARC          | -0.248509866 | 0.000118196    |
| SKCM          | -0.028678591 | 0.537311572    |
| STAD          | -0.416348802 | 7.33174E-17    |
| TGCT          | 0.009174245  | 0.912791093    |
| THCA          | 0.081747701  | 0.072961439    |
| THYM          | 0.128545008  | 0.167206427    |
| UCEC          | -0.130559092 | 0.002724785    |
| UCS           | -0.131062915 | 0.335635046    |
| UVM           | -0.210780095 | 0.06055276     |

Abbreviations: ACC: adrenocortical cancer; BLCA: bladder urothelial carcinoma; BRCA: breast invasive carcinoma; CESC: cervical and endocervical cancer; CHOL: cholangiocarcinoma; COAD: colon adenocarcinoma; Cor: Correlation Coefficient; DLBC: diffuse large B-cell lymphoma; ESCA: esophageal carcinoma; GBM glioblastoma multiforme; HNSC: head and neck squamous cell carcinoma; KICH kidney chromophobe; KIRC: kidney clear cell carcinoma; KIRP: kidney papillary cell carcinoma; LAML: acute myeloid leukemia; LGG: brain lower grade glioma; LIHC: liver hepatocellular carcinoma; LUAD: lung adenocarcinoma; LUSC: lung squamous cell carcinoma; MESO: mesothelioma; MHC: major histocompatibility complex; OV: ovarian serous cystadenocarcinoma; PAAD: pancreatic adenocarcinoma; PCPG: pheochromocytoma and paraganglioma; PRAD: prostate adenocarcinoma; P-value: Probability; READ: rectum adenocarcinoma; SARC: sarcoma; SKCM: skin cutaneous melanoma; STAD: stomach adenocarcinoma; TGCT: testicular germ cell tumor; THCA thyroid carcinoma; THYM: thymoma; TMB: Tumor Mutational Burden. UCEC: uterine corpus endometrioid carcinoma; UCS uterine carcinosarcoma; UVM: uveal melanoma.

**Supplementary Table 9. Correlation analysis between SMARCD3 expression and MSI.**

| <b>Cancer</b> | <b>Cor</b>   | <b>P-value</b> |
|---------------|--------------|----------------|
| ACC           | 0.389427817  | 0.00038925     |
| BLCA          | -0.006666261 | 0.893212601    |
| BRCA          | 0.066280138  | 0.032829853    |
| CESC          | 0.082075055  | 0.154794435    |
| CHOL          | 0.063577864  | 0.711744092    |
| COAD          | -0.019202283 | 0.692349301    |
| DLBC          | -0.115185236 | 0.435631652    |
| ESCA          | -0.070510215 | 0.375616548    |
| GBM           | -0.094619809 | 0.246242253    |
| HNSC          | 0.07985558   | 0.075597959    |
| KICH          | 0.226617566  | 0.069478634    |
| KIRC          | -0.108636567 | 0.046941524    |
| KIRP          | 0.005971051  | 0.920057875    |
| LAML          | 0.022714749  | 0.8112551      |
| LGG           | 0.106366941  | 0.016471796    |
| LIHC          | -0.053040044 | 0.309570081    |
| LUAD          | 0.012778586  | 0.773217965    |
| LUSC          | -0.043470362 | 0.335445197    |
| MESO          | 0.084083463  | 0.452622256    |
| OV            | -0.064526651 | 0.288960264    |
| PAAD          | -0.190126665 | 0.011730639    |
| PCPG          | -0.019295516 | 0.798225431    |
| PRAD          | 0.003344828  | 0.940827544    |
| READ          | -0.097405826 | 0.232545481    |
| SARC          | -0.058408013 | 0.354848418    |
| SKCM          | 0.200464993  | 1.24499E-05    |
| STAD          | -0.300430545 | 3.06459E-09    |
| TGCT          | 0.146437471  | 0.073754348    |
| THCA          | 0.144220848  | 0.001353713    |
| THYM          | -0.003316277 | 0.971568932    |
| UCEC          | -0.006561196 | 0.879318285    |
| UCS           | 0.097918589  | 0.472783895    |
| UVM           | 0.189538462  | 0.092200351    |

Abbreviations: ACC: adrenocortical cancer; BLCA: bladder urothelial carcinoma; BRCA: breast invasive carcinoma; CESC: cervical and endocervical cancer; CHOL: cholangiocarcinoma; COAD: colon adenocarcinoma; Cor: Correlation Coefficient; DLBC: diffuse large B-cell lymphoma; ESCA: esophageal carcinoma; GBM glioblastoma multiforme; GO: Gene Ontology; GSEA: Gene Set Enrichment; HNSC: head and neck squamous cell carcinoma; KEGG: Kyoto Encyclopedia of Genes and Genomes; KICH kidney chromophobe; KIRC: kidney clear cell carcinoma; KIRP: kidney papillary cell carcinoma; LAML: acute myeloid leukemia; LGG: brain lower grade glioma; LIHC: liver hepatocellular carcinoma; LUAD: lung adenocarcinoma; LUSC: lung squamous cell carcinoma; MESO: mesothelioma; MHC: major histocompatibility complex; MSI: Microsatellite Instability; OV: ovarian serous cystadenocarcinoma; PAAD: pancreatic adenocarcinoma; PCPG: pheochromocytoma and paraganglioma; PRAD: prostate adenocarcinoma; P-value: Probability; READ: rectum adenocarcinoma; SARC: sarcoma; SKCM: skin cutaneous melanoma; STAD: stomach adenocarcinoma; TGCT: testicular germ cell tumor; THCA thyroid carcinoma; THYM: thymoma; UCEC: uterine corpus endometrioid carcinoma; UCS uterine carcinosarcoma; UVM: uveal melanoma.
